# Supplementary material for: Prediction of chemical indicators for quality of Zanthoxylum spices from multi-regions using hyperspectral imaging combined with chemometrics
Source: Frontiers journal article supplement (doi:10.3389/fsufs.2022.1036892), 2022-10-26
Supplement: Table_1.DOCX [file Table_1.DOCX]

Supplementary Material

# Supplementary Tables

**Table. S1.** Abbreviation list

| Abbreviation | Full name |
| --- | --- |
| AOC | antioxidation capability |
| BPNN | back-propagation neural network |
| CQJJ | Jiangjin District, Chongqing City |
| GHJ | *Zanthoxylum schinifolium* Sieb.et Zucc, namely “Green Huajiao” |
| GSLN | Longnan City, Gansu Province |
| GSQA | Qin’an County, Gansu Province |
| GZGL | Guanling Buyei and Miao Autonomous County, Guizhou Province |
| GZZF | Zhenfeng County, Guizhou Province |
| HBSC | She County, Hebei Province |
| HSI | hyperspectral imaging |
| IVSO | iteratively variable subset optimization |
| MASS | model adaptive space shrinkage |
| MSC | multiplicative signal correction |
| PLSR | partial least squares regression |
| R2c | coefficient of the calibration set |
| R2p | coefficient of the prediction set |
| RF | random forest |
| RHJ | *Zanthoxylum bungeanum* Maxim, namely “Red Huajiao” |
| RMSEC | root mean square error of the calibration set |
| RMSEP | root mean square error of the prediction set |
| RPD | relative percent deviation |
| SCHY | Hanyuan County, Sichuan Province |
| SCJY | Jinyang County, Sichuan Province |
| SCLC | Lu County, Sichuan Province |
| SCMC | Mao County, Sichuan Province |
| SCPC | Pingchang County, Sichuan Province |
| SCPX | Pengxi County, Sichuan Province |
| SDZZ | Zaozhuang City, Shandong Province |
| SEC | second derivative |
| SPA | successive projections algorithm |
| SVM | support vector machine |
| SWN | selected wavelengths number (SWN) |
| SXHC | Hancheng City, Shaanxi Province |
| SXRC | Ruicheng County, Shanxi Province |
| SXYC | Yangcheng County, Shanxi Province |
| TALC | total alkylamides content |
| VISSA | variable iterative space shrinkage approach |
| VOC | volatile oil content |
| WT | wavelet transform |
| YNKM | Kunming City, Yunnan Province |
| YNYS | Yongshan County, Yunnan Province |

All abbreviations are listed in alphabetical order.
